# Supplementary material for: PhaSepDB: a database of liquid–liquid phase separation related proteins
Source: PubMed Central journal article supplement — Nucleic Acids Res. 2019 Oct 4;48(D1):D354–9. doi: 10.1093/nar/gkz847 (PMC6943039; doi:10.1093/nar/gkz847), 2019-10-04
Supplement: gkz847_supplemental_file.pdf [file gkz847_supplemental_file.pdf]

# PhaSepDB: A Database of Liquid-liquid Phase Separation

## Related Proteins

Kaiqiang You<sup>1,†</sup>, Qi Huang<sup>1, †</sup>, Chunyu Yu<sup>1, †</sup>, Boyan Shen<sup>1</sup>, Cristoffer Sevilla<sup>2</sup>, Minglei Shi<sup>3</sup>, Henning Hermjakob<sup>2,4,\*</sup>, Yang Chen<sup>3,\*</sup>, Tingting Li<sup>1,\*</sup>

<sup>1</sup> Department of Biomedical Informatics, Peking University Health Science Center, Beijing 100191, China

<sup>2</sup> European Molecular Biology Laboratory, European Bioinformatics Institute (EMBL-EBI), Wellcome Genome Campus, Hinxton, Cambridgeshire CB10 1SD, UK.

<sup>3</sup> MOE Key Laboratory of Bioinformatics, Bioinformatics Division and Center for Synthetic & Systems Biology, BNRist, Department of Automation, Tsinghua University, Beijing 100084, China

<sup>4</sup> State Key Laboratory of Proteomics, Beijing Proteome Research Center, National Center for Protein Sciences (Beijing), Beijing Institute of Life Omics, Beijing 102206, China

\* To whom correspondence should be addressed. Tel: +86 13810582006; Email: [litt@hsc.pku.edu.cn](mailto:litt@hsc.pku.edu.cn)

Correspondence may also be addressed to Yang Chen. Email: [yc@mail.tsinghua.edu.cn](mailto:yc@mail.tsinghua.edu.cn)

Correspondence may also be addressed to Henning Hermjakob. Email: [hhe@ebi.ac.uk](mailto:hhe@ebi.ac.uk)

† These authors are equal contributors.

---

## SUPPLEMENTARY DATA

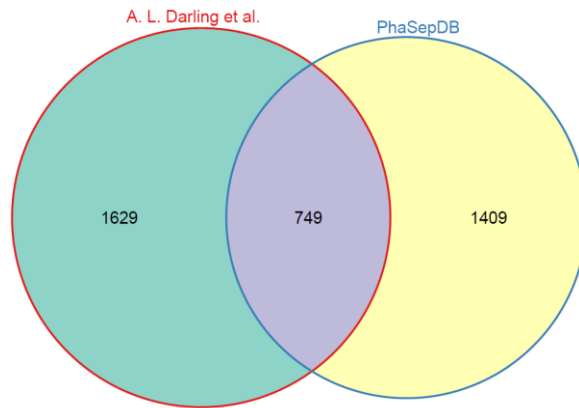

**Figure S1 Comparison between PhaSepDB and PMLO-related proteins (A. L. Darling *et al.*) related to Figure 2B**

A. L. Darling *et al.* collect human proteinaceous membrane-less organelles (PMLOs) related proteins from online QuickGO tools complemented with literature search (7). The comparison included proteins localized in nucleolus, nuclear speckles, stress granules, paraspeckles, PML bodies, Cajal body, P granule, P-body, nuclear pore complex and histone locus body, as in Figure 2B.

**Table S1 The detail program parameters and annotation resources used in Figure 1B.**

The analysis was conducted on Linux operating system with corresponding packages. Note that online server of ESpritz, PLAAC and CIDER should produce identical results.

| Type                                         | Program/database                                                                                                   | Note                                                                                                                                                                                                                                                                                                                                           |
|----------------------------------------------|--------------------------------------------------------------------------------------------------------------------|------------------------------------------------------------------------------------------------------------------------------------------------------------------------------------------------------------------------------------------------------------------------------------------------------------------------------------------------|
| Post-translational modifications (PTMs)      | PhosphoSitePlus (1)                                                                                                | Acetylation, methylation, SUMOylation and phosphorylation sites of each proteins were retrieved directly from the PhosphoSitePlus online website ( <a href="https://www.phosphosite.org/staticDownloads">https://www.phosphosite.org/staticDownloads</a> ).                                                                                    |
| Secondary structure and domain annotation    | UniProt (2)                                                                                                        | The secondary structure annotations were extracted from the UniProt database using the text format . In detail, in the FT (Feature Table) lines, HELIX/STRAND/TURN(secondary structure) , DOMAIN(protein domain), ZN_FING(zinc finger), DNA_BIND(DNA binding), COILED(coiled coil) and COMPBIAS(compositionally biased region) were extracted. |
| IDR prediction                               | ESpritz (3)<br>( <a href="http://protein.bio.unipd.it/espritz/">http://protein.bio.unipd.it/espritz/</a> )         | The X-ray prediction type and 5% False Positive Rate (FPR) were used.                                                                                                                                                                                                                                                                          |
| Prion like amino acid composition prediction | PLAAC (4)( <a href="http://plaac.wi.mit.edu/">http://plaac.wi.mit.edu/</a> )                                       | The relative weighting of background probabilities (a) was set as 0.5 and the background frequency was Homo Sapiens( <a href="https://github.com/whitehead/plaac/blob/master/web/bg_freqs/bg_freqs_HUMAN.txt">https://github.com/whitehead/plaac/blob/master/web/bg_freqs/bg_freqs_HUMAN.txt</a> ).                                            |
| Pi-pi contact frequency                      | Pi-Pi (5)<br>( <a href="https://doi.org/10.7554/eLife.31486.022">https://doi.org/10.7554/eLife.31486.022</a> )     | The default parameters were used in the python scripts given in the original research.                                                                                                                                                                                                                                                         |
| Hydropathy                                   | CIDER (6)<br>( <a href="http://pappulab.wustl.edu/CIDER/analysis/">http://pappulab.wustl.edu/CIDER/analysis/</a> ) | localCIDER provides an implicit distributed computing model to all of CIDER's calculations. The hydropathy was calculated for each protein sequence using the function <code>get_linear_hydropathy(blobLen=9)</code> from localCIDER python package.                                                                                           |

## REFERENCES

1. Hornbeck, P. V., Zhang, B., Murray, B., Kornhauser, J.M., Latham, V. and Skrzypek, E. (2015) PhosphoSitePlus, 2014: mutations, PTMs and recalibrations. *Nucleic Acids Res*, **43**, D512-20.
2. Bateman, A., Martin, M.J., O'Donovan, C., Magrane, M., Alpi, E., Antunes, R., Bely, B., Bingley, M., Bonilla, C., Britto, R., *et al.* (2017) UniProt: the universal protein knowledgebase. *Nucleic Acids Res.*, **45**, D158–D169.
3. Walsh, I., Martin, A.J.M., Di Domenico, T. and Tosatto, S.C.E. (2012) ESpritz: accurate and fast prediction of protein disorder. *Bioinformatics*, **28**, 503–509.
4. Lancaster, A.K., Nutter-Upham, A., Lindquist, S. and King, O.D. (2014) PLAAC: a web and command-line application to identify proteins with prion-like amino acid composition. *Bioinformatics*, **30**, 2501–2502.
5. Vernon, R.M., Chong, P.A., Tsang, B., Kim, T.H., Bah, A., Farber, P., Lin, H. and Forman-Kay, J.D. (2018) Pi-Pi contacts are an overlooked protein feature relevant to phase separation. *Elife*, **7**.
6. Holehouse, A.S., Das, R.K., Ahad, J.N., Richardson, M.O.G. and Pappu, R. V. (2017) CIDER: Resources to Analyze Sequence-Ensemble Relationships of Intrinsically Disordered Proteins. *Biophys. J.*, **112**, 16–21.
7. Darling, A.L., Liu, Y., Oldfield, C.J. and Uversky, V.N. (2018) Intrinsically Disordered Proteome of Human Membrane-Less Organelles. *Proteomics*, **18**, 1–12.
